# Supplementary material
Source: PubMed Central journal article supplement (PMC6802048)
Supplement: jamaneurol-77-25-s001.pdf [file jamaneurol-77-25-s001.pdf]

## Supplementary Online Content

Sporns PB, Sträter R, Minnerup J, et al. Feasibility, safety, and outcome of endovascular recanalization in childhood stroke: the Save ChildS study. *JAMA Neurol.* Published online October 14, 2019. doi:10.1001/jamaneurol.2019.3403

**eFigure.** Course of ASPECTS in Patients of the Save ChildS Study (n=73)

**eTable 1.** List of Participating Stroke Centers (n = 27)

**eTable 2.** Characteristics of Patients With Cerebral Arteriopathy (n = 7)

This supplementary material has been provided by the authors to give readers additional information about their work.

eFigure. Course of ASPECTS in patients of the Save ChildS study (n=73)

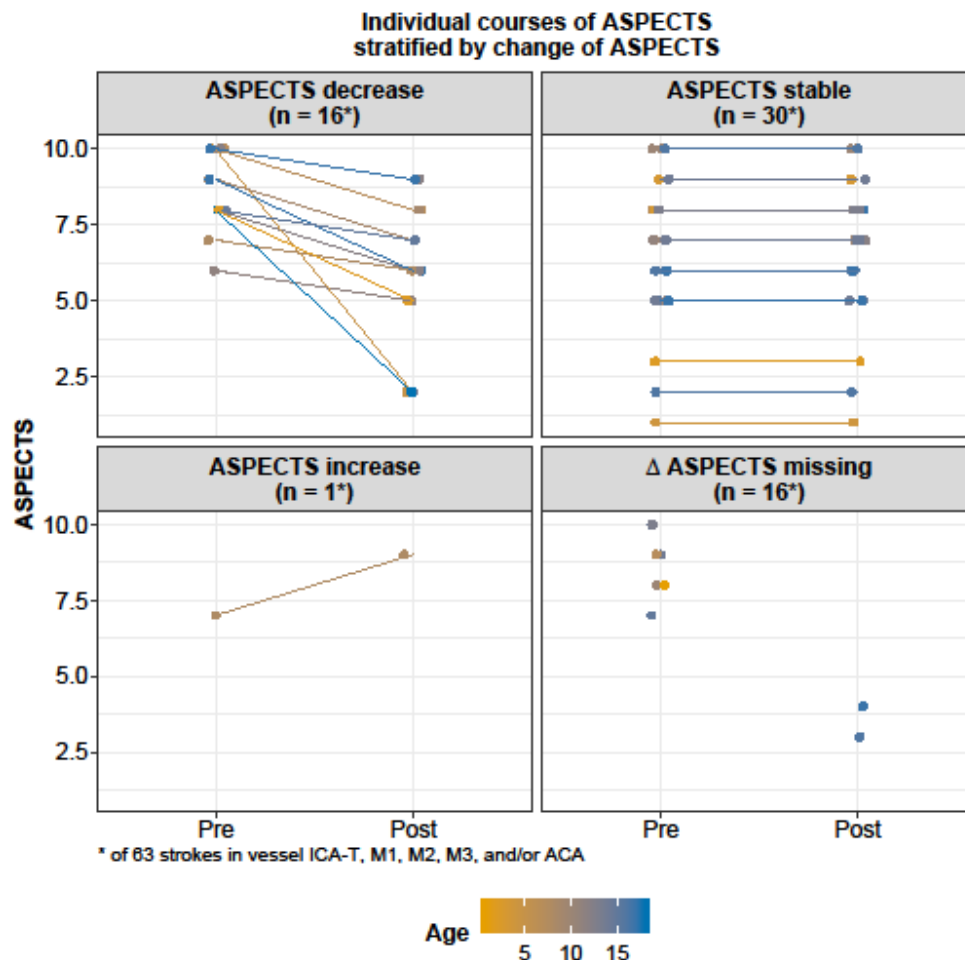

**Legend:**

ASPECTS = Alberta Stroke Program Early Computed Tomography Score, ICA = distal internal carotid artery, M1, M2, M3 = segments of the middle cerebral artery, ACA = anterior cerebral artery, pre = admission imaging, post = follow-up imaging

eTable 1. List of participating stroke centers (n = 27)

| <b>Name of Stroke Center</b>                      | <b>Country</b> | <b>Number of Patients (n = 73)</b> |
|---------------------------------------------------|----------------|------------------------------------|
| University of Münster                             | Germany        | 8                                  |
| University of Hamburg-Eppendorf                   | Germany        | 6                                  |
| University of Lübeck                              | Germany        | 2                                  |
| University of Regensburg                          | Germany        | 1                                  |
| University of Tübingen                            | Germany        | 1                                  |
| Technical University of Munich                    | Germany        | 2                                  |
| University of Innsbruck                           | Austria        | 4                                  |
| University of Aachen                              | Germany        | 2                                  |
| University of Bochum                              | Germany        | 1                                  |
| University of Heidelberg                          | Germany        | 3                                  |
| University of Düsseldorf                          | Germany        | 1                                  |
| University of Göttingen                           | Germany        | 3                                  |
| University of Hannover                            | Germany        | 2                                  |
| University of Homburg                             | Germany        | 1                                  |
| University of Linz                                | Austria        | 3                                  |
| University of Leipzig                             | Germany        | 2                                  |
| University of Pavia                               | Italy          | 1                                  |
| University of Dresden                             | Germany        | 1                                  |
| University of Kiel                                | Germany        | 1                                  |
| University of Magdeburg                           | Germany        | 2                                  |
| University of Ulm                                 | Germany        | 2                                  |
| Krupp-Hospital Essen                              | Germany        | 3                                  |
| Hospital of Stuttgart                             | Germany        | 6                                  |
| Massachusetts General Hospital/Harvard University | USA            | 3                                  |
| University of Wien                                | Austria        | 4                                  |
| University of Stanford                            | USA            | 7                                  |
| University of Cologne                             | Germany        | 1                                  |

eTable 2. Characteristics of patients with cerebral arteriopathy (n = 7)

| Patient | Age | Time to Onset | Vessel    | CASCADE | Etiology known at admission | Device                                       | mTICI | Complications | PedNIHSS admission | PedNIHSS day 7 | mRS discharge | mRS 6 months |
|---------|-----|---------------|-----------|---------|-----------------------------|----------------------------------------------|-------|---------------|--------------------|----------------|---------------|--------------|
| 1       | 14  | 3.0           | ICA       | FCA     | No                          | SR 4x20                                      | 3     | none          | 5                  | 0              | 0             | 0            |
| 2       | 15  | 1.5           | M1        | FCA     | No                          | SR 4x20                                      | 2b    | spasms        | 20                 | 5              | 1             | 1            |
| 3       | 16  | 1.0           | M1        | BCA     | No                          | SR 4x20<br>,<br>Aspiration<br>5F             | 2b    | none          | 13                 | 10             | 1             | 1            |
| 4       | 8   | 24.0          | VA,<br>BA | FCA     | No                          | SR 4x20                                      | 2b    | none          | 27                 | 10             | 3             | 1            |
| 5       | 8   | 3.5           | M1        | FCA     | No                          | SR 4x15                                      | 1     | none          | 8                  | 4              | 3             | -            |
| 6       | 12  | 18.0          | ICA       | FCA     | No                          | Aspiration device 1 <sup>st</sup> generation | 1     | none          | 8                  | 18             | 4             | 4            |
| 7       | 8   | 5.0           | BA        | FCA     | No                          | SR 4x30<br>,<br>Aspiration<br>4F             | 2b    | none          | 3                  | 3              | 1             | 1            |

**Legend:**

ICA = internal carotid artery, M1 = M1 segment of the middle cerebral artery, VA = vertebral artery, BA = basilar artery, CASCADE = Childhood Arterial Ischemic Stroke Standardized Classification and Diagnostic Evaluation Classification, FCA = focal cerebral arteriopathy, BCA = bilateral cerebral arteriopathy, SR = Stent Retriever, 4x15, 4x20, 4x30 = size of stent retriever in millimeter, F = French, mTICI = modified treatment in cerebral infarction score, PedNIHSS = Pediatric National Institutes of Health Stroke Scale, mRS = modified Rankin Scale Score
